# Supplementary material for: Hierarchical classification-based pan-cancer methylation analysis to classify primary cancer
Source: BMC Bioinformatics. 2023 Dec 8;24:465. doi: 10.1186/s12859-023-05529-0 (PMC10709847; doi:10.1186/s12859-023-05529-0)
Supplement: Supplementary file 2 — Additional file 2: Provides the ID of TCGA Samples. [file 12859_2023_5529_MOESM2_ESM.xlsx]

## Sheet: Sheet1
Code of TCGA sample
Sample ID	Type
TCGA-OR-A5L9-01	ACC
TCGA-OR-A5KU-01	ACC
TCGA-PK-A5HB-01	ACC
TCGA-OR-A5JG-01	ACC
TCGA-OR-A5JT-01	ACC
TCGA-OR-A5J3-01	ACC
TCGA-OR-A5LC-01	ACC
TCGA-OR-A5J5-01	ACC
TCGA-PA-A5YG-01	ACC
TCGA-OR-A5JY-01	ACC
TCGA-OR-A5LE-01	ACC
TCGA-OR-A5L3-01	ACC
TCGA-OR-A5LN-01	ACC
TCGA-OR-A5JW-01	ACC
TCGA-PK-A5HA-01	ACC
TCGA-OR-A5J7-01	ACC
TCGA-OR-A5JR-01	ACC
TCGA-OR-A5JD-01	ACC
TCGA-OR-A5LR-01	ACC
TCGA-PK-A5H8-01	ACC
TCGA-OR-A5JQ-01	ACC
TCGA-OR-A5JL-01	ACC
TCGA-OR-A5JK-01	ACC
TCGA-OR-A5LB-01	ACC
TCGA-OR-A5LH-01	ACC
TCGA-OR-A5JV-01	ACC
TCGA-OR-A5JS-01	ACC
TCGA-OR-A5LD-01	ACC
TCGA-OR-A5LG-01	ACC
TCGA-OR-A5JF-01	ACC
TCGA-OR-A5JB-01	ACC
TCGA-OR-A5LS-01	ACC
TCGA-OR-A5K8-01	ACC
TCGA-PK-A5H9-01	ACC
TCGA-OR-A5LO-01	ACC
TCGA-OR-A5J8-01	ACC
TCGA-OR-A5JX-01	ACC
TCGA-OR-A5JC-01	ACC
TCGA-OR-A5KZ-01	ACC
TCGA-OR-A5JE-01	ACC
TCGA-OR-A5LM-01	ACC
TCGA-OR-A5K1-01	ACC
TCGA-OR-A5K2-01	ACC
TCGA-OR-A5JM-01	ACC
TCGA-OR-A5LA-01	ACC
TCGA-OR-A5J9-01	ACC
TCGA-OR-A5KW-01	ACC
TCGA-OR-A5K0-01	ACC
TCGA-OR-A5K5-01	ACC
TCGA-OR-A5K6-01	ACC
TCGA-OR-A5J6-01	ACC
TCGA-OR-A5JO-01	ACC
TCGA-OR-A5KX-01	ACC
TCGA-OR-A5LL-01	ACC
TCGA-OR-A5LJ-01	ACC
TCGA-OR-A5K4-01	ACC
TCGA-OR-A5L8-01	ACC
TCGA-OR-A5L4-01	ACC
TCGA-OR-A5JZ-01	ACC
TCGA-OR-A5JP-01	ACC
TCGA-OR-A5KO-01	ACC
TCGA-OU-A5PI-01	ACC
TCGA-OR-A5JJ-01	ACC
TCGA-OR-A5LP-01	ACC
TCGA-OR-A5L5-01	ACC
TCGA-OR-A5KY-01	ACC
TCGA-OR-A5LK-01	ACC
TCGA-OR-A5J4-01	ACC
TCGA-OR-A5JA-01	ACC
TCGA-OR-A5KV-01	ACC
TCGA-OR-A5K3-01	ACC
TCGA-P6-A5OG-01	ACC
TCGA-OR-A5K9-01	ACC
TCGA-OR-A5KT-01	ACC
TCGA-P6-A5OF-01	ACC
TCGA-OR-A5JI-01	ACC
TCGA-OR-A5L6-01	ACC
TCGA-OR-A5LT-01	ACC
TCGA-OR-A5J2-01	ACC
TCGA-OR-A5J1-01	ACC
TCGA-DK-AA6M-01	BLCA
TCGA-GU-A763-01	BLCA
TCGA-DK-A3IN-01	BLCA
TCGA-E7-A5KF-01	BLCA
TCGA-CU-A0YO-01	BLCA
TCGA-XF-A9T3-01	BLCA
TCGA-CF-A47Y-01	BLCA
TCGA-4Z-AA83-01	BLCA
TCGA-CU-A72E-01	BLCA
TCGA-XF-A9T5-01	BLCA
TCGA-G2-A2EL-01	BLCA
TCGA-BT-A3PH-01	BLCA
TCGA-BL-A13J-01	BLCA
TCGA-FD-A62P-01	BLCA
TCGA-FD-A6TH-01	BLCA
TCGA-2F-A9KR-01	BLCA
TCGA-DK-AA74-01	BLCA
TCGA-GD-A2C5-01	BLCA
TCGA-ZF-AA4U-01	BLCA
TCGA-XF-A9SP-01	BLCA
TCGA-FD-A3SR-01	BLCA
TCGA-G2-A2EO-01	BLCA
TCGA-ZF-AA5N-01	BLCA
TCGA-K4-A83P-01	BLCA
TCGA-ZF-A9RE-01	BLCA
TCGA-XF-AAN8-01	BLCA
TCGA-DK-A6B0-01	BLCA
TCGA-BT-A20N-01	BLCA
TCGA-ZF-AA5H-01	BLCA
TCGA-G2-A2EJ-01	BLCA
TCGA-GC-A3RB-01	BLCA
TCGA-BT-A42F-01	BLCA
TCGA-FD-A3SN-01	BLCA
TCGA-FT-A61P-01	BLCA
TCGA-G2-A2EF-01	BLCA
TCGA-XF-AAMF-01	BLCA
TCGA-FD-A5BS-01	BLCA
TCGA-CF-A3MH-01	BLCA
TCGA-GV-A3QK-01	BLCA
TCGA-LT-A5Z6-01	BLCA
TCGA-DK-A1AD-01	BLCA
TCGA-CF-A8HX-01	BLCA
TCGA-C4-A0F6-01	BLCA
TCGA-XF-AAMQ-01	BLCA
TCGA-XF-A9SX-01	BLCA
TCGA-FD-A5C1-01	BLCA
TCGA-XF-A8HH-01	BLCA
TCGA-DK-A3IQ-01	BLCA
TCGA-CF-A27C-01	BLCA
TCGA-LC-A66R-01	BLCA
TCGA-FD-A3B8-01	BLCA
TCGA-BL-A0C8-01	BLCA
TCGA-G2-A3VY-01	BLCA
TCGA-BT-A2LA-01	BLCA
TCGA-ZF-AA54-01	BLCA
TCGA-DK-AA6R-01	BLCA
TCGA-YF-AA3M-01	BLCA
TCGA-UY-A78N-01	BLCA
TCGA-FT-A3EE-01	BLCA
TCGA-FD-A3B7-01	BLCA
TCGA-ZF-AA4T-01	BLCA
TCGA-2F-A9KW-01	BLCA
TCGA-ZF-A9R1-01	BLCA
TCGA-CF-A47S-01	BLCA
TCGA-DK-A1AB-01	BLCA
TCGA-G2-AA3F-01	BLCA
TCGA-K4-A3WU-01	BLCA
TCGA-K4-A6MB-01	BLCA
TCGA-FD-A62N-01	BLCA
TCGA-E7-A3X6-01	BLCA
TCGA-XF-AAN7-01	BLCA
TCGA-FD-A6TG-01	BLCA
TCGA-UY-A9PB-01	BLCA
TCGA-CF-A47V-01	BLCA
TCGA-KQ-A41R-01	BLCA
TCGA-XF-A9ST-01	BLCA
TCGA-ZF-AA4X-01	BLCA
TCGA-FD-A5BZ-01	BLCA
TCGA-GC-A3BM-01	BLCA
TCGA-UY-A9PF-01	BLCA
TCGA-CF-A7I0-01	BLCA
TCGA-E7-A4IJ-01	BLCA
TCGA-FD-A5BV-01	BLCA
TCGA-DK-A3IL-01	BLCA
TCGA-FD-A43X-01	BLCA
TCGA-GU-A766-01	BLCA
TCGA-FD-A6TB-01	BLCA
TCGA-DK-A1A5-01	BLCA
TCGA-UY-A78L-01	BLCA
TCGA-FD-A6TA-01	BLCA
TCGA-GU-A762-01	BLCA
TCGA-K4-A3WS-01	BLCA
TCGA-DK-A3X1-01	BLCA
TCGA-XF-AAME-01	BLCA
TCGA-XF-A9T8-01	BLCA
TCGA-YC-A89H-01	BLCA
TCGA-4Z-AA7Y-01	BLCA
TCGA-KQ-A41Q-01	BLCA
TCGA-G2-AA3D-01	BLCA
TCGA-XF-AAMY-01	BLCA
TCGA-4Z-AA81-01	BLCA
TCGA-GU-AATQ-01	BLCA
TCGA-FD-A6TE-01	BLCA
TCGA-CF-A3MG-01	BLCA
TCGA-UY-A8OC-01	BLCA
TCGA-UY-A8OB-01	BLCA
TCGA-K4-A5RJ-01	BLCA
TCGA-GD-A3OQ-01	BLCA
TCGA-ZF-A9RG-01	BLCA
TCGA-CF-A47X-01	BLCA
TCGA-BT-A20Q-01	BLCA
TCGA-FD-A5C0-01	BLCA
TCGA-ZF-A9R4-01	BLCA
TCGA-FD-A3SS-01	BLCA
TCGA-FJ-A3ZE-01	BLCA
TCGA-ZF-A9RD-01	BLCA
TCGA-E7-A6ME-01	BLCA
TCGA-BT-A20O-01	BLCA
TCGA-G2-A2EK-01	BLCA
TCGA-DK-AA75-01	BLCA
TCGA-GV-A3JZ-01	BLCA
TCGA-FD-A3SO-01	BLCA
TCGA-FD-A43S-01	BLCA
TCGA-SY-A9G5-01	BLCA
TCGA-4Z-AA89-01	BLCA
TCGA-XF-A8HE-01	BLCA
TCGA-GC-A3WC-01	BLCA
TCGA-ZF-A9RM-01	BLCA
TCGA-FD-A5BR-01	BLCA
TCGA-G2-A2EC-01	BLCA
TCGA-XF-A9T4-01	BLCA
TCGA-FD-A62S-01	BLCA
TCGA-DK-A6B5-01	BLCA
TCGA-ZF-AA51-01	BLCA
TCGA-XF-A9SY-01	BLCA
TCGA-GD-A6C6-01	BLCA
TCGA-XF-A8HI-01	BLCA
TCGA-2F-A9KQ-01	BLCA
TCGA-G2-A3IB-01	BLCA
TCGA-CU-A0YR-01	BLCA
TCGA-BT-A42B-01	BLCA
TCGA-CU-A3KJ-01	BLCA
TCGA-DK-A3WW-01	BLCA
TCGA-YF-AA3L-01	BLCA
TCGA-GV-A40E-01	BLCA
TCGA-DK-A1A6-01	BLCA
TCGA-4Z-AA7N-01	BLCA
TCGA-DK-A2I1-01	BLCA
TCGA-K4-A4AB-01	BLCA
TCGA-DK-A2HX-01	BLCA
TCGA-4Z-AA7M-01	BLCA
TCGA-BL-A3JM-01	BLCA
TCGA-XF-A9SU-01	BLCA
TCGA-GD-A76B-01	BLCA
TCGA-BT-A20J-01	BLCA
TCGA-DK-AA71-01	BLCA
TCGA-DK-A3WY-01	BLCA
TCGA-GC-A3RC-01	BLCA
TCGA-ZF-AA53-01	BLCA
TCGA-CF-A9FF-01	BLCA
TCGA-LT-A8JT-01	BLCA
TCGA-GC-A3YS-01	BLCA
TCGA-XF-AAML-01	BLCA
TCGA-CF-A47W-01	BLCA
TCGA-DK-A1AF-01	BLCA
TCGA-XF-AAN3-01	BLCA
TCGA-5N-A9KM-01	BLCA
TCGA-XF-AAN2-01	BLCA
TCGA-DK-A3IV-01	BLCA
TCGA-4Z-AA7R-01	BLCA
TCGA-XF-A9SJ-01	BLCA
TCGA-C4-A0F0-01	BLCA
TCGA-DK-AA6T-01	BLCA
TCGA-ZF-AA58-01	BLCA
TCGA-ZF-AA4R-01	BLCA
TCGA-DK-A3IS-01	BLCA
TCGA-FD-A3SQ-01	BLCA
TCGA-K4-AAQO-01	BLCA
TCGA-GC-A6I3-01	BLCA
TCGA-XF-AAMT-01	BLCA
TCGA-XF-AAN4-01	BLCA
TCGA-DK-A3IM-01	BLCA
TCGA-DK-AA6P-01	BLCA
TCGA-E5-A4TZ-01	BLCA
TCGA-E7-A7PW-01	BLCA
TCGA-S5-A6DX-01	BLCA
TCGA-GV-A6ZA-01	BLCA
TCGA-FD-A43N-01	BLCA
TCGA-FD-A3B5-01	BLCA
TCGA-4Z-AA80-01	BLCA
TCGA-CF-A3MF-01	BLCA
TCGA-ZF-A9R0-01	BLCA
TCGA-XF-AAMJ-01	BLCA
TCGA-BT-A0S7-01	BLCA
TCGA-BT-A42E-01	BLCA
TCGA-XF-AAMZ-01	BLCA
TCGA-E7-A7DU-01	BLCA
TCGA-GU-A42R-01	BLCA
TCGA-FD-A3SM-01	BLCA
TCGA-ZF-AA4N-01	BLCA
TCGA-CF-A1HR-01	BLCA
TCGA-FD-A5BT-01	BLCA
TCGA-DK-A6B1-01	BLCA
TCGA-FD-A5BY-01	BLCA
TCGA-5N-A9KI-01	BLCA
TCGA-GV-A3QH-01	BLCA
TCGA-CF-A9FL-01	BLCA
TCGA-S5-AA26-01	BLCA
TCGA-BL-A5ZZ-01	BLCA
TCGA-E5-A4U1-01	BLCA
TCGA-PQ-A6FN-01	BLCA
TCGA-E7-A5KE-01	BLCA
TCGA-GV-A40G-01	BLCA
TCGA-CF-A8HY-01	BLCA
TCGA-CF-A3MI-01	BLCA
TCGA-ZF-A9RL-01	BLCA
TCGA-HQ-A5ND-01	BLCA
TCGA-BT-A20U-01	BLCA
TCGA-G2-A3IE-01	BLCA
TCGA-BT-A42C-01	BLCA
TCGA-E7-A8O8-01	BLCA
TCGA-UY-A8OD-01	BLCA
TCGA-SY-A9G0-01	BLCA
TCGA-XF-A9T0-01	BLCA
TCGA-DK-A1A3-01	BLCA
TCGA-H4-A2HO-01	BLCA
TCGA-DK-A6AW-01	BLCA
TCGA-ZF-A9R5-01	BLCA
TCGA-4Z-AA84-01	BLCA
TCGA-XF-A9SG-01	BLCA
TCGA-2F-A9KP-01	BLCA
TCGA-GU-A42P-01	BLCA
TCGA-KQ-A41N-01	BLCA
TCGA-GC-A4ZW-01	BLCA
TCGA-ZF-A9R2-01	BLCA
TCGA-K4-A4AC-01	BLCA
TCGA-XF-A8HC-01	BLCA
TCGA-FD-A43U-01	BLCA
TCGA-BT-A2LD-01	BLCA
TCGA-GV-A3JV-01	BLCA
TCGA-DK-A1AC-01	BLCA
TCGA-DK-A3WX-01	BLCA
TCGA-E7-A85H-01	BLCA
TCGA-XF-AAMG-01	BLCA
TCGA-GU-A764-01	BLCA
TCGA-XF-A9T6-01	BLCA
TCGA-G2-A2ES-01	BLCA
TCGA-DK-A2I4-01	BLCA
TCGA-HQ-A2OF-01	BLCA
TCGA-GU-AATO-01	BLCA
TCGA-DK-A1AG-01	BLCA
TCGA-E7-A3Y1-01	BLCA
TCGA-XF-A8HF-01	BLCA
TCGA-CU-A3QU-01	BLCA
TCGA-KQ-A41P-01	BLCA
TCGA-XF-A9T2-01	BLCA
TCGA-BL-A13I-01	BLCA
TCGA-GD-A3OS-01	BLCA
TCGA-FD-A6TK-01	BLCA
TCGA-BT-A3PK-01	BLCA
TCGA-DK-AA6U-01	BLCA
TCGA-UY-A78M-01	BLCA
TCGA-C4-A0F1-01	BLCA
TCGA-E7-A8O7-01	BLCA
TCGA-DK-AA6Q-01	BLCA
TCGA-GV-A3QG-01	BLCA
TCGA-H4-A2HQ-01	BLCA
TCGA-E7-A4XJ-01	BLCA
TCGA-E7-A678-01	BLCA
TCGA-K4-A54R-01	BLCA
TCGA-FD-A6TD-01	BLCA
TCGA-K4-A5RI-01	BLCA
TCGA-DK-AA77-01	BLCA
TCGA-E7-A97Q-01	BLCA
TCGA-2F-A9KT-01	BLCA
TCGA-XF-A9SW-01	BLCA
TCGA-DK-A6AV-01	BLCA
TCGA-K4-A3WV-01	BLCA
TCGA-XF-AAMX-01	BLCA
TCGA-XF-A9SH-01	BLCA
TCGA-FD-A3B4-01	BLCA
TCGA-XF-AAN0-01	BLCA
TCGA-BT-A20P-01	BLCA
TCGA-ZF-AA4W-01	BLCA
TCGA-UY-A9PA-01	BLCA
TCGA-DK-A3IT-01	BLCA
TCGA-FJ-A871-01	BLCA
TCGA-DK-AA6W-01	BLCA
TCGA-XF-A9SL-01	BLCA
TCGA-CF-A5UA-01	BLCA
TCGA-FD-A3N5-01	BLCA
TCGA-R3-A69X-01	BLCA
TCGA-DK-A3X2-01	BLCA
TCGA-ZF-A9RN-01	BLCA
TCGA-FJ-A3Z9-01	BLCA
TCGA-E7-A677-01	BLCA
TCGA-E7-A519-01	BLCA
TCGA-CF-A9FM-01	BLCA
TCGA-XF-AAMR-01	BLCA
TCGA-BT-A20X-01	BLCA
TCGA-G2-AA3C-01	BLCA
TCGA-CU-A0YN-01	BLCA
TCGA-FJ-A3Z7-01	BLCA
TCGA-CF-A9FH-01	BLCA
TCGA-GV-A3QI-01	BLCA
TCGA-4Z-AA82-01	BLCA
TCGA-GC-A6I1-01	BLCA
TCGA-FD-A5BX-01	BLCA
TCGA-FD-A3B6-01	BLCA
TCGA-ZF-AA5P-01	BLCA
TCGA-BT-A20V-01	BLCA
TCGA-FD-A3SP-01	BLCA
TCGA-GD-A3OP-01	BLCA
TCGA-4Z-AA86-01	BLCA
TCGA-2F-A9KO-01	BLCA
TCGA-GU-A42Q-01	BLCA
TCGA-HQ-A5NE-01	BLCA
TCGA-PQ-A6FI-01	BLCA
TCGA-E5-A2PC-01	BLCA
TCGA-FD-A3SL-01	BLCA
TCGA-FD-A5BU-01	BLCA
TCGA-UY-A9PE-01	BLCA
TCGA-FD-A3N6-01	BLCA
TCGA-CU-A3YL-01	BLCA
TCGA-GV-A3JW-01	BLCA
TCGA-ZF-A9R3-01	BLCA
TCGA-E7-A6MF-01	BLCA
TCGA-FD-A43P-01	BLCA
TCGA-ZF-AA52-01	BLCA
TCGA-E7-A541-01	BLCA
TCGA-DK-AA6L-01	BLCA
TCGA-FD-A6TI-01	BLCA
TCGA-XF-A9SZ-01	BLCA
TCGA-C4-A0EZ-01	BLCA
TCGA-FD-A3SJ-01	BLCA
TCGA-ZF-AA56-01	BLCA
TCGA-XF-AAMH-01	BLCA
TCGA-FD-A3NA-01	BLCA
TCGA-DK-A3IK-01	BLCA
TCGA-ZF-A9RF-01	BLCA
TCGA-UY-A78P-01	BLCA
TCGA-DK-AA6X-01	BLCA
TCGA-BT-A3PJ-01	BLCA
TCGA-K4-A6FZ-01	BLCA
TCGA-YC-A9TC-01	BLCA
TCGA-ZF-A9R7-01	BLCA
TCGA-GC-A3OO-01	BLCA
TCGA-DK-A1A7-01	BLCA
TCGA-BT-A2LB-01	BLCA
TCGA-GV-A3QF-01	BLCA
TCGA-ZF-A9R9-01	BLCA
TCGA-XF-AAN5-01	BLCA
TCGA-XF-A8HG-01	BLCA
TCGA-DK-AA76-01	BLCA
TCGA-DK-A2I2-01	BLCA
TCGA-CF-A1HS-01	BLCA
TCGA-KQ-A41O-01	BLCA
TCGA-CF-A47T-01	BLCA
TCGA-4Z-AA7W-01	BLCA
TCGA-XF-A8HB-01	BLCA
TCGA-E7-A97P-01	BLCA
TCGA-ZF-AA4V-01	BLCA
TCGA-HQ-A2OE-01	BLCA
TCGA-XF-A9SI-01	BLCA
TCGA-DK-A1AA-01	BLCA
TCGA-K4-A5RH-01	BLCA
TCGA-XF-AAN1-01	BLCA
TCGA-CU-A5W6-01	BLCA
TCGA-XF-A9SM-01	BLCA
TCGA-C4-A0F7-01	BLCA
TCGA-GC-A3RD-01	BLCA
TCGA-4Z-AA7S-01	BLCA
TCGA-DK-A1AE-01	BLCA
TCGA-4Z-AA7Q-01	BLCA
TCGA-DK-AA6S-01	BLCA
TCGA-XF-A8HD-01	BLCA
TCGA-DK-A3IU-01	BLCA
TCGA-KQ-A41S-01	BLCA
TCGA-4Z-AA7O-01	BLCA
TCGA-E7-A7XN-01	BLCA
TCGA-G2-AA3B-01	BLCA
TCGA-UY-A78O-01	BLCA
TCGA-XF-AAMW-01	BLCA
TCGA-BT-A0YX-01	BLCA
TCGA-FD-A6TC-01	BLCA
TCGA-GC-A3I6-01	BLCA
TCGA-XF-A9SK-01	BLCA
TCGA-CF-A5U8-01	BLCA
TCGA-GU-AATP-01	BLCA
TCGA-BT-A20T-01	BLCA
TCGA-FD-A62O-01	BLCA
TCGA-MV-A51V-01	BLCA
TCGA-UY-A9PH-01	BLCA
TCGA-FD-A3B3-01	BLCA
TCGA-FD-A6TF-01	BLCA
TCGA-UY-A78K-01	BLCA
TCGA-BT-A20W-01	BLCA
TCGA-E7-A7DV-01	BLCA
TCGA-DK-A2I6-01	BLCA
TCGA-BT-A20R-01	BLCA
TCGA-FJ-A3ZF-01	BLCA
TCGA-4Z-AA87-01	BLCA
TCGA-E7-A6MD-01	BLCA
TCGA-XF-A9SV-01	BLCA
TCGA-GV-A3JX-01	BLCA
TCGA-ZF-A9RC-01	BLCA
TCGA-FD-A43Y-01	BLCA
TCGA-GU-A767-01	BLCA
TCGA-UY-A9PD-01	BLCA
TCGA-DK-A6B2-01	BLCA
TCGA-YC-A8S6-01	BLCA
TCGA-DK-A6B6-01	BLCA
TCGA-E2-A1B6-01	BRCA
TCGA-PE-A5DE-01	BRCA
TCGA-E9-A1RB-01	BRCA
TCGA-A2-A0ST-01	BRCA
TCGA-B6-A0RO-01	BRCA
TCGA-AC-A23H-01	BRCA
TCGA-AC-A2BM-01	BRCA
TCGA-BH-A0WA-01	BRCA
TCGA-EW-A1J6-01	BRCA
TCGA-D8-A27V-01	BRCA
TCGA-B6-A40C-01	BRCA
TCGA-A2-A1FZ-01	BRCA
TCGA-A7-A26H-01	BRCA
TCGA-BH-A0BA-01	BRCA
TCGA-BH-AB28-01	BRCA
TCGA-E2-A2P6-01	BRCA
TCGA-B6-A0RT-01	BRCA
TCGA-AR-A1AY-01	BRCA
TCGA-A2-A25C-01	BRCA
TCGA-S3-AA10-01	BRCA
TCGA-OL-A5DA-01	BRCA
TCGA-D8-A27R-01	BRCA
TCGA-EW-A6SB-01	BRCA
TCGA-A7-A5ZV-01	BRCA
TCGA-LL-A50Y-01	BRCA
TCGA-B6-A0WX-01	BRCA
TCGA-LL-A442-01	BRCA
TCGA-C8-A26Z-01	BRCA
TCGA-BH-A1FU-01	BRCA
TCGA-AO-A1KO-01	BRCA
TCGA-BH-A0E0-01	BRCA
TCGA-E9-A2JT-01	BRCA
TCGA-OL-A5D6-01	BRCA
TCGA-BH-A1FJ-01	BRCA
TCGA-E2-A3DX-01	BRCA
TCGA-A1-A0SE-01	BRCA
TCGA-E9-A3HO-01	BRCA
TCGA-D8-A1XT-01	BRCA
TCGA-C8-A1HI-01	BRCA
TCGA-E9-A1NA-01	BRCA
TCGA-A2-A0T4-01	BRCA
TCGA-BH-A0BS-01	BRCA
TCGA-MS-A51U-01	BRCA
TCGA-B6-A0WT-01	BRCA
TCGA-B6-A0RN-01	BRCA
TCGA-D8-A1Y2-01	BRCA
TCGA-PL-A8LY-01	BRCA
TCGA-B6-A0RU-01	BRCA
TCGA-EW-A1PH-01	BRCA
TCGA-D8-A1XJ-01	BRCA
TCGA-BH-A0DG-01	BRCA
TCGA-C8-A3M7-01	BRCA
TCGA-E2-A1L6-01	BRCA
TCGA-D8-A1XY-01	BRCA
TCGA-D8-A27G-01	BRCA
TCGA-E2-A109-01	BRCA
TCGA-AR-A1AM-01	BRCA
TCGA-4H-AAAK-01	BRCA
TCGA-AC-A5XS-01	BRCA
TCGA-AC-A5EI-01	BRCA
TCGA-A2-A3XS-01	BRCA
TCGA-3C-AALI-01	BRCA
TCGA-OL-A5RY-01	BRCA
TCGA-E2-A1IF-01	BRCA
TCGA-AC-A2FO-01	BRCA
TCGA-BH-A209-01	BRCA
TCGA-AR-A24S-01	BRCA
TCGA-A2-A3KD-01	BRCA
TCGA-B6-A1KF-01	BRCA
TCGA-BH-A1FL-01	BRCA
TCGA-E2-A15K-01	BRCA
TCGA-E9-A1NI-01	BRCA
TCGA-AC-A2FK-01	BRCA
TCGA-E9-A226-01	BRCA
TCGA-E2-A1AZ-01	BRCA
TCGA-D8-A1X8-01	BRCA
TCGA-A2-A0T5-01	BRCA
TCGA-AO-A12G-01	BRCA
TCGA-C8-A1HO-01	BRCA
TCGA-LD-A74U-01	BRCA
TCGA-AR-A0TQ-01	BRCA
TCGA-AO-A0JE-01	BRCA
TCGA-AC-A62X-01	BRCA
TCGA-AN-A0XR-01	BRCA
TCGA-E9-A228-01	BRCA
TCGA-E9-A1RA-01	BRCA
TCGA-BH-A0HA-01	BRCA
TCGA-D8-A1XS-01	BRCA
TCGA-OL-A6VR-01	BRCA
TCGA-E9-A22G-01	BRCA
TCGA-LL-A740-01	BRCA
TCGA-AR-A1AS-01	BRCA
TCGA-D8-A27M-01	BRCA
TCGA-BH-A0BZ-01	BRCA
TCGA-BH-A0RX-01	BRCA
TCGA-S3-A6ZG-01	BRCA
TCGA-AR-A1AW-01	BRCA
TCGA-AN-A0XP-01	BRCA
TCGA-EW-A2FV-01	BRCA
TCGA-D8-A1XD-01	BRCA
TCGA-A2-A4S1-01	BRCA
TCGA-AR-A24M-01	BRCA
TCGA-BH-A1FH-01	BRCA
TCGA-D8-A1JM-01	BRCA
TCGA-AC-A6NO-01	BRCA
TCGA-BH-A0DV-01	BRCA
TCGA-E2-A572-01	BRCA
TCGA-BH-A1ES-01	BRCA
TCGA-A2-A0YI-01	BRCA
TCGA-AC-A2QJ-01	BRCA
TCGA-EW-A1PE-01	BRCA
TCGA-BH-A0H6-01	BRCA
TCGA-BH-A0BM-01	BRCA
TCGA-A7-A2KD-01	BRCA
TCGA-E2-A1II-01	BRCA
TCGA-D8-A27I-01	BRCA
TCGA-A2-A0YD-01	BRCA
TCGA-BH-A0C0-01	BRCA
TCGA-B6-A3ZX-01	BRCA
TCGA-E9-A1NG-01	BRCA
TCGA-S3-A6ZH-01	BRCA
TCGA-HN-A2NL-01	BRCA
TCGA-EW-A1IW-01	BRCA
TCGA-JL-A3YW-01	BRCA
TCGA-AN-A0XN-01	BRCA
TCGA-A1-A0SK-01	BRCA
TCGA-E9-A6HE-01	BRCA
TCGA-BH-A1EX-01	BRCA
TCGA-LL-A441-01	BRCA
TCGA-AO-A125-01	BRCA
TCGA-C8-A26W-01	BRCA
TCGA-A2-A0YM-01	BRCA
TCGA-BH-A0DP-01	BRCA
TCGA-UL-AAZ6-01	BRCA
TCGA-A2-A0CK-01	BRCA
TCGA-AR-A2LN-01	BRCA
TCGA-D8-A1JF-01	BRCA
TCGA-OL-A6VQ-01	BRCA
TCGA-LL-A5YP-01	BRCA
TCGA-AR-A252-01	BRCA
TCGA-A2-A25F-01	BRCA
TCGA-PE-A5DC-01	BRCA
TCGA-EW-A6SC-01	BRCA
TCGA-GM-A2DO-01	BRCA
TCGA-E2-A1LL-01	BRCA
TCGA-C8-A273-01	BRCA
TCGA-AR-A0U2-01	BRCA
TCGA-C8-A1HL-01	BRCA
TCGA-BH-A0AU-01	BRCA
TCGA-A2-A0T1-01	BRCA
TCGA-BH-A28O-01	BRCA
TCGA-AR-A24W-01	BRCA
TCGA-EW-A1P1-01	BRCA
TCGA-E2-A9RU-01	BRCA
TCGA-AR-A0TT-01	BRCA
TCGA-AC-A3W6-01	BRCA
TCGA-D8-A1JJ-01	BRCA
TCGA-OL-A66P-01	BRCA
TCGA-E2-A1B4-01	BRCA
TCGA-B6-A1KC-01	BRCA
TCGA-E9-A5UP-01	BRCA
TCGA-A2-A1G4-01	BRCA
TCGA-AR-A24L-01	BRCA
TCGA-BH-A0H3-01	BRCA
TCGA-LL-A73Z-01	BRCA
TCGA-EW-A1IZ-01	BRCA
TCGA-AO-A0JA-01	BRCA
TCGA-AR-A0TX-01	BRCA
TCGA-AO-A0JG-01	BRCA
TCGA-OL-A66N-01	BRCA
TCGA-A2-A1FV-01	BRCA
TCGA-D8-A1XC-01	BRCA
TCGA-A7-A4SC-01	BRCA
TCGA-AR-A2LH-01	BRCA
TCGA-LL-A6FR-01	BRCA
TCGA-GM-A2DB-01	BRCA
TCGA-LL-A5YO-01	BRCA
TCGA-E9-A1N3-01	BRCA
TCGA-PL-A8LV-01	BRCA
TCGA-AO-A1KR-01	BRCA
TCGA-AN-A0XL-01	BRCA
TCGA-E2-A15J-01	BRCA
TCGA-E9-A244-01	BRCA
TCGA-E9-A24A-01	BRCA
TCGA-GM-A2DL-01	BRCA
TCGA-S3-AA11-01	BRCA
TCGA-AC-A3QQ-01	BRCA
TCGA-Z7-A8R5-01	BRCA
TCGA-B6-A400-01	BRCA
TCGA-AQ-A54O-01	BRCA
TCGA-BH-A1FC-01	BRCA
TCGA-E9-A22B-01	BRCA
TCGA-A2-A3XV-01	BRCA
TCGA-BH-A0B9-01	BRCA
TCGA-AC-A6IX-01	BRCA
TCGA-D8-A1JT-01	BRCA
TCGA-AR-A2LL-01	BRCA
TCGA-D8-A1X7-01	BRCA
TCGA-E9-A247-01	BRCA
TCGA-D8-A1X5-01	BRCA
TCGA-AO-A03U-01	BRCA
TCGA-A8-A075-01	BRCA
TCGA-D8-A73X-01	BRCA
TCGA-B6-A0WY-01	BRCA
TCGA-E9-A1R4-01	BRCA
TCGA-E9-A3Q9-01	BRCA
TCGA-BH-A0E1-01	BRCA
TCGA-EW-A423-01	BRCA
TCGA-EW-A1J2-01	BRCA
TCGA-BH-A0GY-01	BRCA
TCGA-W8-A86G-01	BRCA
TCGA-A7-A5ZW-01	BRCA
TCGA-E2-A106-01	BRCA
TCGA-AR-A0TV-01	BRCA
TCGA-E2-A56Z-01	BRCA
TCGA-AC-A2FM-01	BRCA
TCGA-C8-A1HF-01	BRCA
TCGA-C8-A27B-01	BRCA
TCGA-A7-A13E-01	BRCA
TCGA-A2-A1G6-01	BRCA
TCGA-B6-A402-01	BRCA
TCGA-A2-A0T7-01	BRCA
TCGA-A7-A0D9-01	BRCA
TCGA-AC-A5XU-01	BRCA
TCGA-BH-A204-01	BRCA
TCGA-B6-A0WW-01	BRCA
TCGA-A2-A3XZ-01	BRCA
TCGA-AR-A1AI-01	BRCA
TCGA-D8-A1XL-01	BRCA
TCGA-E9-A5UO-01	BRCA
TCGA-A2-A0SV-01	BRCA
TCGA-OL-A5RZ-01	BRCA
TCGA-E2-A1LS-01	BRCA
TCGA-AO-A0JJ-01	BRCA
TCGA-AR-A24R-01	BRCA
TCGA-AO-A1KP-01	BRCA
TCGA-D8-A1JL-01	BRCA
TCGA-E2-A1LH-01	BRCA
TCGA-B6-A0X7-01	BRCA
TCGA-D8-A4Z1-01	BRCA
TCGA-E9-A1RE-01	BRCA
TCGA-OL-A5RV-01	BRCA
TCGA-E2-A1BC-01	BRCA
TCGA-GM-A2DM-01	BRCA
TCGA-A2-A0YF-01	BRCA
TCGA-A2-A3Y0-01	BRCA
TCGA-AC-A3YI-01	BRCA
TCGA-E9-A22D-01	BRCA
TCGA-C8-A274-01	BRCA
TCGA-A1-A0SF-01	BRCA
TCGA-EW-A6SD-01	BRCA
TCGA-C8-A1HM-01	BRCA
TCGA-A7-A426-01	BRCA
TCGA-E9-A1RC-01	BRCA
TCGA-AR-A1AU-01	BRCA
TCGA-AO-A129-01	BRCA
TCGA-A2-A4RX-01	BRCA
TCGA-BH-A6R8-01	BRCA
TCGA-BH-A1FM-01	BRCA
TCGA-D8-A1JP-01	BRCA
TCGA-AO-A0JM-01	BRCA
TCGA-E9-A1N6-01	BRCA
TCGA-BH-A0DS-01	BRCA
TCGA-V7-A7HQ-01	BRCA
TCGA-D8-A27L-01	BRCA
TCGA-A2-A4RY-01	BRCA
TCGA-E9-A1NF-01	BRCA
TCGA-EW-A1PA-01	BRCA
TCGA-AC-A3TM-01	BRCA
TCGA-D8-A27H-01	BRCA
TCGA-AR-A2LE-01	BRCA
TCGA-EW-A1PG-01	BRCA
TCGA-GM-A3NY-01	BRCA
TCGA-BH-A5J0-01	BRCA
TCGA-E9-A1NC-01	BRCA
TCGA-BH-A0HK-01	BRCA
TCGA-AR-A24Z-01	BRCA
TCGA-A1-A0SM-01	BRCA
TCGA-AO-A124-01	BRCA
TCGA-S3-A6ZF-01	BRCA
TCGA-Z7-A8R6-01	BRCA
TCGA-OL-A66K-01	BRCA
TCGA-D8-A1JC-01	BRCA
TCGA-LD-A7W5-01	BRCA
TCGA-E2-A1LA-01	BRCA
TCGA-AR-A256-01	BRCA
TCGA-JL-A3YX-01	BRCA
TCGA-BH-A42V-01	BRCA
TCGA-EW-A1OW-01	BRCA
TCGA-E9-A5FK-01	BRCA
TCGA-D8-A1XB-01	BRCA
TCGA-AN-A0XO-01	BRCA
TCGA-BH-A0DQ-01	BRCA
TCGA-B6-A2IU-01	BRCA
TCGA-E9-A227-01	BRCA
TCGA-AR-A250-01	BRCA
TCGA-OL-A5D8-01	BRCA
TCGA-A2-A0YL-01	BRCA
TCGA-A7-A5ZX-01	BRCA
TCGA-D8-A1JG-01	BRCA
TCGA-AQ-A04H-01	BRCA
TCGA-AR-A5QQ-01	BRCA
TCGA-D8-A1XG-01	BRCA
TCGA-AR-A0TZ-01	BRCA
TCGA-AR-A0U3-01	BRCA
TCGA-A2-A0YE-01	BRCA
TCGA-BH-A0HN-01	BRCA
TCGA-AO-A0JF-01	BRCA
TCGA-A2-A0T0-01	BRCA
TCGA-EW-A1OX-01	BRCA
TCGA-AR-A24V-01	BRCA
TCGA-AN-A0XS-01	BRCA
TCGA-C8-A8HQ-01	BRCA
TCGA-AC-A2B8-01	BRCA
TCGA-A2-A4S3-01	BRCA
TCGA-A2-A0CR-01	BRCA
TCGA-LL-A6FP-01	BRCA
TCGA-E2-A1L8-01	BRCA
TCGA-AC-A2QH-01	BRCA
TCGA-A2-A0CO-01	BRCA
TCGA-A2-A1FW-01	BRCA
TCGA-AC-A62V-01	BRCA
TCGA-E2-A576-01	BRCA
TCGA-GM-A3NW-01	BRCA
TCGA-A7-A4SB-01	BRCA
TCGA-E9-A245-01	BRCA
TCGA-BH-A0AZ-01	BRCA
TCGA-AO-A126-01	BRCA
TCGA-AC-A8OR-01	BRCA
TCGA-E2-A573-01	BRCA
TCGA-E2-A1LE-01	BRCA
TCGA-OL-A6VO-01	BRCA
TCGA-A7-A4SF-01	BRCA
TCGA-A2-A0YH-01	BRCA
TCGA-LL-A5YN-01	BRCA
TCGA-AR-A1AO-01	BRCA
TCGA-A2-A3XU-01	BRCA
TCGA-AC-A23G-01	BRCA
TCGA-GM-A3XN-01	BRCA
TCGA-A7-A26J-01	BRCA
TCGA-A2-A25B-01	BRCA
TCGA-D8-A27W-01	BRCA
TCGA-GM-A3XL-01	BRCA
TCGA-E9-A2JS-01	BRCA
TCGA-C8-A275-01	BRCA
TCGA-E2-A1IK-01	BRCA
TCGA-BH-A1FB-01	BRCA
TCGA-C8-A3M8-01	BRCA
TCGA-AN-A0XU-01	BRCA
TCGA-A2-A3XW-01	BRCA
TCGA-A7-A6VV-01	BRCA
TCGA-D8-A1XU-01	BRCA
TCGA-D8-A1X6-01	BRCA
TCGA-EW-A3U0-01	BRCA
TCGA-AQ-A7U7-01	BRCA
TCGA-A1-A0SI-01	BRCA
TCGA-A2-A25A-01	BRCA
TCGA-PL-A8LX-01	BRCA
TCGA-E9-A1RH-01	BRCA
TCGA-AO-A12E-01	BRCA
TCGA-A7-A13H-01	BRCA
TCGA-AO-A0JC-01	BRCA
TCGA-EW-A6SA-01	BRCA
TCGA-E9-A1R5-01	BRCA
TCGA-E9-A54Y-01	BRCA
TCGA-E9-A243-01	BRCA
TCGA-AC-A3TN-01	BRCA
TCGA-E2-A1IO-01	BRCA
TCGA-OL-A5S0-01	BRCA
TCGA-C8-A26Y-01	BRCA
TCGA-A2-A25D-01	BRCA
TCGA-EW-A1J3-01	BRCA
TCGA-A2-A0EP-01	BRCA
TCGA-BH-A1F8-01	BRCA
TCGA-B6-A0X5-01	BRCA
TCGA-AN-A0XW-01	BRCA
TCGA-BH-A0AW-01	BRCA
TCGA-D8-A27F-01	BRCA
TCGA-BH-A0B6-01	BRCA
TCGA-E9-A229-01	BRCA
TCGA-D8-A1JK-01	BRCA
TCGA-AQ-A04L-01	BRCA
TCGA-B6-A0WV-01	BRCA
TCGA-E2-A1LI-01	BRCA
TCGA-A7-A26F-01	BRCA
TCGA-GM-A5PX-01	BRCA
TCGA-BH-A1FD-01	BRCA
TCGA-A7-A13F-01	BRCA
TCGA-AR-A5QN-01	BRCA
TCGA-E2-A2P5-01	BRCA
TCGA-AO-A1KS-01	BRCA
TCGA-BH-A42U-01	BRCA
TCGA-BH-A0DD-01	BRCA
TCGA-B6-A0RE-01	BRCA
TCGA-BH-A208-01	BRCA
TCGA-EW-A1IX-01	BRCA
TCGA-BH-A1F6-01	BRCA
TCGA-BH-A0HX-01	BRCA
TCGA-E2-A14N-01	BRCA
TCGA-A2-A259-01	BRCA
TCGA-GM-A2DD-01	BRCA
TCGA-E2-A1B1-01	BRCA
TCGA-D8-A73U-01	BRCA
TCGA-D8-A27N-01	BRCA
TCGA-D8-A1X9-01	BRCA
TCGA-OL-A5RW-01	BRCA
TCGA-AR-A0TR-01	BRCA
TCGA-E9-A22E-01	BRCA
TCGA-OL-A5RX-01	BRCA
TCGA-D8-A1XO-01	BRCA
TCGA-AC-A23C-01	BRCA
TCGA-E9-A1NE-01	BRCA
TCGA-A7-A56D-01	BRCA
TCGA-A1-A0SH-01	BRCA
TCGA-C8-A9FZ-01	BRCA
TCGA-C8-A8HR-01	BRCA
TCGA-BH-A6R9-01	BRCA
TCGA-AR-A5QP-01	BRCA
TCGA-C8-A8HP-01	BRCA
TCGA-AR-A24X-01	BRCA
TCGA-A1-A0SB-01	BRCA
TCGA-D8-A1Y0-01	BRCA
TCGA-BH-A0GZ-01	BRCA
TCGA-B6-A0RM-01	BRCA
TCGA-AR-A2LR-01	BRCA
TCGA-BH-A2L8-01	BRCA
TCGA-AR-A251-01	BRCA
TCGA-AO-A12B-01	BRCA
TCGA-BH-A202-01	BRCA
TCGA-BH-A0DH-01	BRCA
TCGA-D8-A1JN-01	BRCA
TCGA-EW-A1OV-01	BRCA
TCGA-E2-A1IE-01	BRCA
TCGA-AR-A1AR-01	BRCA
TCGA-EW-A1P3-01	BRCA
TCGA-BH-A8FY-01	BRCA
TCGA-A1-A0SN-01	BRCA
TCGA-E9-A295-01	BRCA
TCGA-AO-A1KT-01	BRCA
TCGA-E2-A1IU-01	BRCA
TCGA-AO-A0JL-01	BRCA
TCGA-AC-A8OP-01	BRCA
TCGA-EW-A1P8-01	BRCA
TCGA-GI-A2C8-01	BRCA
TCGA-AR-A24P-01	BRCA
TCGA-E9-A22H-01	BRCA
TCGA-D8-A3Z6-01	BRCA
TCGA-AR-A0U4-01	BRCA
TCGA-AR-A2LK-01	BRCA
TCGA-B6-A409-01	BRCA
TCGA-B6-A0X1-01	BRCA
TCGA-A2-A0SX-01	BRCA
TCGA-B6-A0RI-01	BRCA
TCGA-E9-A248-01	BRCA
TCGA-A2-A0SU-01	BRCA
TCGA-EW-A1P4-01	BRCA
TCGA-AO-A128-01	BRCA
TCGA-AR-A24T-01	BRCA
TCGA-A8-A08O-01	BRCA
TCGA-EW-A1P6-01	BRCA
TCGA-AC-A2FE-01	BRCA
TCGA-GM-A2DF-01	BRCA
TCGA-D8-A1XF-01	BRCA
TCGA-E9-A1N4-01	BRCA
TCGA-A2-A0CT-01	BRCA
TCGA-E9-A1RG-01	BRCA
TCGA-XX-A899-01	BRCA
TCGA-BH-A1F2-01	BRCA
TCGA-GM-A3XG-01	BRCA
TCGA-E9-A1N9-01	BRCA
TCGA-A1-A0SP-01	BRCA
TCGA-AN-A0XT-01	BRCA
TCGA-S3-AA17-01	BRCA
TCGA-AC-A2FF-01	BRCA
TCGA-BH-A0HI-01	BRCA
TCGA-EW-A1PF-01	BRCA
TCGA-B6-A0RL-01	BRCA
TCGA-E2-A1L9-01	BRCA
TCGA-A7-A26E-01	BRCA
TCGA-BH-A0W3-01	BRCA
TCGA-AO-A03L-01	BRCA
TCGA-D8-A1J9-01	BRCA
TCGA-LL-A7T0-01	BRCA
TCGA-OL-A66O-01	BRCA
TCGA-AO-A03N-01	BRCA
TCGA-BH-A0HF-01	BRCA
TCGA-E2-A1LG-01	BRCA
TCGA-A7-A6VY-01	BRCA
TCGA-AC-A2QI-01	BRCA
TCGA-A2-A4S2-01	BRCA
TCGA-AR-A1AP-01	BRCA
TCGA-EW-A1PC-01	BRCA
TCGA-GM-A2DA-01	BRCA
TCGA-3C-AALJ-01	BRCA
TCGA-BH-A42T-01	BRCA
TCGA-A7-A4SA-01	BRCA
TCGA-A7-A26G-01	BRCA
TCGA-A2-A0YJ-01	BRCA
TCGA-A2-A3KC-01	BRCA
TCGA-OL-A66L-01	BRCA
TCGA-AR-A2LM-01	BRCA
TCGA-E2-A10C-01	BRCA
TCGA-AC-A7VC-01	BRCA
TCGA-AR-A1AN-01	BRCA
TCGA-5L-AAT1-01	BRCA
TCGA-HN-A2OB-01	BRCA
TCGA-GM-A5PV-01	BRCA
TCGA-C8-A26V-01	BRCA
TCGA-BH-A1EV-01	BRCA
TCGA-E2-A1IJ-01	BRCA
TCGA-LL-A440-01	BRCA
TCGA-OK-A5Q2-01	BRCA
TCGA-OL-A66I-01	BRCA
TCGA-A7-A6VW-01	BRCA
TCGA-D8-A1JA-01	BRCA
TCGA-E9-A1R3-01	BRCA
TCGA-E2-A1IN-01	BRCA
TCGA-AR-A254-01	BRCA
TCGA-AR-A0TW-01	BRCA
TCGA-B6-A0I1-01	BRCA
TCGA-BH-A8G0-01	BRCA
TCGA-B6-A401-01	BRCA
TCGA-BH-A0H9-01	BRCA
TCGA-E2-A1LB-01	BRCA
TCGA-B6-A0RG-01	BRCA
TCGA-E9-A54X-01	BRCA
TCGA-C8-A1HN-01	BRCA
TCGA-LD-A9QF-01	BRCA
TCGA-BH-A0HB-01	BRCA
TCGA-LL-A73Y-01	BRCA
TCGA-C8-A1HJ-01	BRCA
TCGA-BH-A0W5-01	BRCA
TCGA-A2-A25E-01	BRCA
TCGA-AC-A3W7-01	BRCA
TCGA-B6-A1KN-01	BRCA
TCGA-A2-A1G1-01	BRCA
TCGA-AC-A3W5-01	BRCA
TCGA-A7-A13D-01	BRCA
TCGA-A2-A3XY-01	BRCA
TCGA-B6-A1KI-01	BRCA
TCGA-AR-A24K-01	BRCA
TCGA-E9-A1RI-01	BRCA
TCGA-GM-A2DI-01	BRCA
TCGA-A2-A0T6-01	BRCA
TCGA-EW-A1OZ-01	BRCA
TCGA-EW-A3E8-01	BRCA
TCGA-OL-A5RU-01	BRCA
TCGA-S3-AA12-01	BRCA
TCGA-A2-A1FX-01	BRCA
TCGA-A7-A13G-01	BRCA
TCGA-E2-A10F-01	BRCA
TCGA-A7-A4SD-01	BRCA
TCGA-BH-A0C3-01	BRCA
TCGA-B6-A0RV-01	BRCA
TCGA-LQ-A4E4-01	BRCA
TCGA-AQ-A1H2-01	BRCA
TCGA-D8-A27T-01	BRCA
TCGA-E2-A1IH-01	BRCA
TCGA-EW-A1IY-01	BRCA
TCGA-B6-A0X4-01	BRCA
TCGA-AR-A24O-01	BRCA
TCGA-BH-A0HY-01	BRCA
TCGA-E2-A15I-01	BRCA
TCGA-D8-A1XQ-01	BRCA
TCGA-C8-A278-01	BRCA
TCGA-AC-A3HN-01	BRCA
TCGA-AC-A3BB-01	BRCA
TCGA-A2-A0EU-01	BRCA
TCGA-BH-A1FE-01	BRCA
TCGA-BH-A0H7-01	BRCA
TCGA-A2-A0EN-01	BRCA
TCGA-BH-A0BF-01	BRCA
TCGA-A1-A0SG-01	BRCA
TCGA-AC-A6IW-01	BRCA
TCGA-EW-A1J5-01	BRCA
TCGA-WT-AB41-01	BRCA
TCGA-LL-A5YL-01	BRCA
TCGA-D8-A1XR-01	BRCA
TCGA-AO-A0JB-01	BRCA
TCGA-C8-A27A-01	BRCA
TCGA-AR-A1AK-01	BRCA
TCGA-AC-A3EH-01	BRCA
TCGA-C8-A1HK-01	BRCA
TCGA-B6-A0WZ-01	BRCA
TCGA-GM-A4E0-01	BRCA
TCGA-A8-A0AD-01	BRCA
TCGA-C8-A26X-01	BRCA
TCGA-BH-A5IZ-01	BRCA
TCGA-E9-A22A-01	BRCA
TCGA-A7-A3J1-01	BRCA
TCGA-D8-A1Y3-01	BRCA
TCGA-AC-A3YJ-01	BRCA
TCGA-LL-A8F5-01	BRCA
TCGA-D8-A1XW-01	BRCA
TCGA-D8-A1Y1-01	BRCA
TCGA-BH-A0DK-01	BRCA
TCGA-D8-A1JE-01	BRCA
TCGA-EW-A2FR-01	BRCA
TCGA-E2-A105-01	BRCA
TCGA-PL-A8LZ-01	BRCA
TCGA-BH-A0W4-01	BRCA
TCGA-BH-A0E2-01	BRCA
TCGA-BH-A0BJ-01	BRCA
TCGA-BH-A203-01	BRCA
TCGA-E2-A1B5-01	BRCA
TCGA-E9-A1R7-01	BRCA
TCGA-E2-A14U-01	BRCA
TCGA-E2-A10E-01	BRCA
TCGA-E9-A249-01	BRCA
TCGA-AC-A2BK-01	BRCA
TCGA-E2-A1BD-01	BRCA
TCGA-GI-A2C9-01	BRCA
TCGA-E2-A1LK-01	BRCA
TCGA-BH-A1ET-01	BRCA
TCGA-LD-A7W6-01	BRCA
TCGA-C8-A1HE-01	BRCA
TCGA-D8-A1XM-01	BRCA
TCGA-AC-A7VB-01	BRCA
TCGA-D8-A1JH-01	BRCA
TCGA-AO-A12C-01	BRCA
TCGA-D8-A73W-01	BRCA
TCGA-B6-A40B-01	BRCA
TCGA-AO-A0JI-01	BRCA
TCGA-BH-A1EU-01	BRCA
TCGA-OL-A5D7-01	BRCA
TCGA-A7-A4SE-01	BRCA
TCGA-OL-A97C-01	BRCA
TCGA-PE-A5DD-01	BRCA
TCGA-A2-A04R-01	BRCA
TCGA-BH-A1F5-01	BRCA
TCGA-S3-AA0Z-01	BRCA
TCGA-AC-A23E-01	BRCA
TCGA-BH-A0B3-01	BRCA
TCGA-D8-A1JS-01	BRCA
TCGA-WT-AB44-01	BRCA
TCGA-EW-A424-01	BRCA
TCGA-BH-A1FR-01	BRCA
TCGA-A7-A425-01	BRCA
TCGA-B6-A0IK-01	BRCA
TCGA-AR-A24U-01	BRCA
TCGA-E9-A1RF-01	BRCA
TCGA-B6-A408-01	BRCA
TCGA-BH-A0HP-01	BRCA
TCGA-E2-A1L7-01	BRCA
TCGA-5T-A9QA-01	BRCA
TCGA-A2-A0SY-01	BRCA
TCGA-BH-A8FZ-01	BRCA
TCGA-A2-A0YG-01	BRCA
TCGA-AC-A2FG-01	BRCA
TCGA-AR-A1AX-01	BRCA
TCGA-AR-A1AL-01	BRCA
TCGA-AQ-A54N-01	BRCA
TCGA-BH-A1EO-01	BRCA
TCGA-D8-A27K-01	BRCA
TCGA-BH-A28Q-01	BRCA
TCGA-EW-A1J1-01	BRCA
TCGA-C8-A1HG-01	BRCA
TCGA-D8-A1XK-01	BRCA
TCGA-AQ-A0Y5-01	BRCA
TCGA-3C-AAAU-01	BRCA
TCGA-A2-A4S0-01	BRCA
TCGA-AR-A1AV-01	BRCA
TCGA-AC-A8OQ-01	BRCA
TCGA-EW-A1PB-01	BRCA
TCGA-A7-A3J0-01	BRCA
TCGA-D8-A1JU-01	BRCA
TCGA-A7-A6VX-01	BRCA
TCGA-E2-A108-01	BRCA
TCGA-BH-A0BT-01	BRCA
TCGA-A2-A0YK-01	BRCA
TCGA-E9-A1N8-01	BRCA
TCGA-E2-A574-01	BRCA
TCGA-A1-A0SO-01	BRCA
TCGA-BH-A0DI-01	BRCA
TCGA-E2-A1IG-01	BRCA
TCGA-E2-A107-01	BRCA
TCGA-5L-AAT0-01	BRCA
TCGA-E9-A1NH-01	BRCA
TCGA-D8-A27E-01	BRCA
TCGA-AR-A24Q-01	BRCA
TCGA-BH-A1F0-01	BRCA
TCGA-AR-A0U0-01	BRCA
TCGA-OL-A66H-01	BRCA
TCGA-3C-AALK-01	BRCA
TCGA-AC-A5EH-01	BRCA
TCGA-EW-A2FW-01	BRCA
TCGA-E9-A1R0-01	BRCA
TCGA-AR-A1AJ-01	BRCA
TCGA-AC-A62Y-01	BRCA
TCGA-E9-A1QZ-01	BRCA
TCGA-E9-A1R2-01	BRCA
TCGA-E9-A3X8-01	BRCA
TCGA-AR-A255-01	BRCA
TCGA-E2-A10B-01	BRCA
TCGA-AO-A0JD-01	BRCA
TCGA-D8-A1JD-01	BRCA
TCGA-D8-A1XA-01	BRCA
TCGA-AO-A1KQ-01	BRCA
TCGA-A8-A0A6-01	BRCA
TCGA-A7-A3RF-01	BRCA
TCGA-A2-A0SW-01	BRCA
TCGA-A7-A3IY-01	BRCA
TCGA-GM-A2D9-01	BRCA
TCGA-D8-A3Z5-01	BRCA
TCGA-E9-A1ND-01	BRCA
TCGA-EW-A1P5-01	BRCA
TCGA-E9-A1RD-01	BRCA
TCGA-AR-A1AQ-01	BRCA
TCGA-LD-A66U-01	BRCA
TCGA-BH-A1EN-01	BRCA
TCGA-BH-A1FN-01	BRCA
TCGA-EW-A1PD-01	BRCA
TCGA-E9-A1N5-01	BRCA
TCGA-D8-A1J8-01	BRCA
TCGA-E9-A3QA-01	BRCA
TCGA-S3-AA15-01	BRCA
TCGA-BH-A0H0-01	BRCA
TCGA-A2-A3XX-01	BRCA
TCGA-AC-A2FB-01	BRCA
TCGA-AC-A3QP-01	BRCA
TCGA-A2-A0YC-01	BRCA
TCGA-GM-A2DK-01	BRCA
TCGA-GM-A2DC-01	BRCA
TCGA-AR-A24N-01	BRCA
TCGA-E2-A1B0-01	BRCA
TCGA-BH-A1EY-01	BRCA
TCGA-EW-A6S9-01	BRCA
TCGA-AC-A8OS-01	BRCA
TCGA-GM-A2DN-01	BRCA
TCGA-AO-A03M-01	BRCA
TCGA-A2-A3XT-01	BRCA
TCGA-A2-A4RW-01	BRCA
TCGA-AC-A6IV-01	BRCA
TCGA-LL-A7SZ-01	BRCA
TCGA-A1-A0SJ-01	BRCA
TCGA-AR-A2LJ-01	BRCA
TCGA-AQ-A1H3-01	BRCA
TCGA-D8-A1JB-01	BRCA
TCGA-BH-A0BC-01	BRCA
TCGA-BH-A1EW-01	BRCA
TCGA-BH-A1FG-01	BRCA
TCGA-EW-A1P7-01	BRCA
TCGA-GM-A2DH-01	BRCA
TCGA-D8-A27P-01	BRCA
TCGA-EW-A2FS-01	BRCA
TCGA-E2-A1IL-01	BRCA
TCGA-A7-A3IZ-01	BRCA
TCGA-E2-A570-01	BRCA
TCGA-OL-A66J-01	BRCA
TCGA-AR-A2LO-01	BRCA
TCGA-E9-A5FL-01	BRCA
TCGA-BH-A201-01	BRCA
TCGA-LL-A5YM-01	BRCA
TCGA-AC-A4ZE-01	BRCA
TCGA-A2-A0T2-01	BRCA
TCGA-AR-A0TP-01	BRCA
TCGA-S3-AA14-01	BRCA
TCGA-B6-A0RS-01	BRCA
TCGA-EW-A1P0-01	BRCA
TCGA-AR-A1AT-01	BRCA
TCGA-A2-A1G0-01	BRCA
TCGA-AR-A24H-01	BRCA
TCGA-D8-A1XV-01	BRCA
TCGA-AR-A2LQ-01	BRCA
TCGA-AC-A3OD-01	BRCA
TCGA-AR-A0TU-01	BRCA
TCGA-AN-A0XV-01	BRCA
TCGA-A2-A0YT-01	BRCA
TCGA-BH-A0B5-01	BRCA
TCGA-D8-A1JI-01	BRCA
TCGA-UU-A93S-01	BRCA
TCGA-E9-A1R6-01	BRCA
TCGA-D8-A1XZ-01	BRCA
TCGA-BH-A0B8-01	BRCA
TCGA-LL-A6FQ-01	BRCA
TCGA-XX-A89A-01	BRCA
TCGA-EW-A1OY-01	BRCA
TCGA-B6-A0RP-01	BRCA
TCGA-LL-A9Q3-01	BRCA
TCGA-A1-A0SQ-01	BRCA
TCGA-AR-A5QM-01	BRCA
TCGA-A7-A26I-01	BRCA
TCGA-EK-A2PG-01	CESC
TCGA-BI-A0VR-01	CESC
TCGA-DS-A0VL-01	CESC
TCGA-VS-A8EC-01	CESC
TCGA-EA-A3QE-01	CESC
TCGA-DS-A0VM-01	CESC
TCGA-FU-A3HY-01	CESC
TCGA-Q1-A5R1-01	CESC
TCGA-DR-A0ZM-01	CESC
TCGA-Q1-A6DW-01	CESC
TCGA-DS-A0VK-01	CESC
TCGA-DS-A3LQ-01	CESC
TCGA-EA-A3QD-01	CESC
TCGA-JW-A5VJ-01	CESC
TCGA-LP-A5U3-01	CESC
TCGA-EA-A6QX-01	CESC
TCGA-EK-A2RA-01	CESC
TCGA-FU-A5XV-01	CESC
TCGA-Q1-A5R2-01	CESC
TCGA-HM-A3JJ-01	CESC
TCGA-C5-A2LS-01	CESC
TCGA-C5-A7X8-01	CESC
TCGA-EK-A2RJ-01	CESC
TCGA-EA-A3HT-01	CESC
TCGA-LP-A7HU-01	CESC
TCGA-MU-A8JM-01	CESC
TCGA-EK-A2IP-01	CESC
TCGA-JW-A5VL-01	CESC
TCGA-FU-A3TX-01	CESC
TCGA-DG-A2KK-01	CESC
TCGA-EK-A2PI-01	CESC
TCGA-EK-A2IR-01	CESC
TCGA-VS-A8EH-01	CESC
TCGA-JW-A5VH-01	CESC
TCGA-C5-A2LV-01	CESC
TCGA-VS-A8EB-01	CESC
TCGA-RA-A741-01	CESC
TCGA-VS-A8EG-01	CESC
TCGA-DG-A2KH-01	CESC
TCGA-C5-A7UE-01	CESC
TCGA-C5-A2LT-01	CESC
TCGA-EA-A5ZD-01	CESC
TCGA-Q1-A73R-01	CESC
TCGA-JW-A5VK-01	CESC
TCGA-EK-A2RM-01	CESC
TCGA-C5-A7UI-01	CESC
TCGA-EK-A2PL-01	CESC
TCGA-EK-A2PM-01	CESC
TCGA-EK-A2GZ-01	CESC
TCGA-HM-A3JK-01	CESC
TCGA-C5-A2M1-01	CESC
TCGA-C5-A7X5-01	CESC
TCGA-IR-A3LA-01	CESC
TCGA-EK-A2PK-01	CESC
TCGA-EA-A5ZF-01	CESC
TCGA-XS-A8TJ-01	CESC
TCGA-BI-A0VS-01	CESC
TCGA-DS-A0VN-01	CESC
TCGA-JX-A5QV-01	CESC
TCGA-EK-A2R8-01	CESC
TCGA-EA-A1QS-01	CESC
TCGA-C5-A3HE-01	CESC
TCGA-IR-A3LF-01	CESC
TCGA-DR-A0ZL-01	CESC
TCGA-FU-A3WB-01	CESC
TCGA-JX-A3PZ-01	CESC
TCGA-EA-A5O9-01	CESC
TCGA-DS-A5RQ-01	CESC
TCGA-EK-A2H0-01	CESC
TCGA-EX-A1H6-01	CESC
TCGA-EA-A5ZE-01	CESC
TCGA-C5-A2LY-01	CESC
TCGA-FU-A3TQ-01	CESC
TCGA-EK-A2RB-01	CESC
TCGA-JW-A5VI-01	CESC
TCGA-EK-A2H1-01	CESC
TCGA-JX-A3Q8-01	CESC
TCGA-FU-A3YQ-01	CESC
TCGA-EX-A69L-01	CESC
TCGA-C5-A7CH-01	CESC
TCGA-FU-A2QG-01	CESC
TCGA-C5-A2M2-01	CESC
TCGA-JW-A5VG-01	CESC
TCGA-PN-A8MA-01	CESC
TCGA-DG-A2KM-01	CESC
TCGA-C5-A2LX-01	CESC
TCGA-EX-A3L1-01	CESC
TCGA-LP-A5U2-01	CESC
TCGA-FU-A3NI-01	CESC
TCGA-Q1-A5R3-01	CESC
TCGA-FU-A770-01	CESC
TCGA-C5-A7CM-01	CESC
TCGA-JX-A3Q0-01	CESC
TCGA-EA-A5FO-01	CESC
TCGA-VS-A9V3-01	CESC
TCGA-C5-A7CL-01	CESC
TCGA-VS-A959-01	CESC
TCGA-LP-A4AX-01	CESC
TCGA-C5-A1MN-01	CESC
TCGA-ZJ-AAXN-01	CESC
TCGA-MA-AA3X-01	CESC
TCGA-UC-A7PG-01	CESC
TCGA-Q1-A6DV-01	CESC
TCGA-DS-A1OD-01	CESC
TCGA-C5-A1M7-01	CESC
TCGA-BI-A20A-01	CESC
TCGA-VS-A9UO-01	CESC
TCGA-EA-A1QT-01	CESC
TCGA-EX-A69M-01	CESC
TCGA-VS-A9UH-01	CESC
TCGA-VS-A9U7-01	CESC
TCGA-ZJ-AAXD-01	CESC
TCGA-VS-A9UB-01	CESC
TCGA-EA-A410-01	CESC
TCGA-ZJ-AB0I-01	CESC
TCGA-VS-A9UD-01	CESC
TCGA-VS-A9U6-01	CESC
TCGA-ZX-AA5X-01	CESC
TCGA-C5-A0TN-01	CESC
TCGA-C5-A7CJ-01	CESC
TCGA-C5-A1MJ-01	CESC
TCGA-EA-A78R-01	CESC
TCGA-VS-A9UY-01	CESC
TCGA-VS-A9U5-01	CESC
TCGA-DS-A1OC-01	CESC
TCGA-ZJ-AAXB-01	CESC
TCGA-EX-A449-01	CESC
TCGA-C5-A1BL-01	CESC
TCGA-VS-A9UQ-01	CESC
TCGA-DS-A1OB-01	CESC
TCGA-ZJ-AAXT-01	CESC
TCGA-IR-A3LB-01	CESC
TCGA-C5-A1ML-01	CESC
TCGA-VS-A9UV-01	CESC
TCGA-LP-A4AU-01	CESC
TCGA-Q1-A6DT-01	CESC
TCGA-C5-A1M8-01	CESC
TCGA-C5-A1ME-01	CESC
TCGA-ZJ-AAXU-01	CESC
TCGA-VS-A957-01	CESC
TCGA-VS-A9V5-01	CESC
TCGA-MU-A5YI-01	CESC
TCGA-ZJ-AAX4-01	CESC
TCGA-C5-A1MK-01	CESC
TCGA-JW-A69B-01	CESC
TCGA-VS-A958-01	CESC
TCGA-ZJ-AAXJ-01	CESC
TCGA-R2-A69V-01	CESC
TCGA-EA-A411-01	CESC
TCGA-VS-A9UP-01	CESC
TCGA-C5-A1MI-01	CESC
TCGA-DS-A1O9-01	CESC
TCGA-VS-A9UZ-01	CESC
TCGA-EA-A43B-01	CESC
TCGA-ZJ-AAX8-01	CESC
TCGA-ZJ-AAXI-01	CESC
TCGA-VS-A9UT-01	CESC
TCGA-DS-A1OA-01	CESC
TCGA-C5-A1MQ-01	CESC
TCGA-VS-A9V0-01	CESC
TCGA-VS-A9UC-01	CESC
TCGA-ZJ-AAXA-01	CESC
TCGA-Q1-A73P-01	CESC
TCGA-VS-A9V2-01	CESC
TCGA-VS-A9UU-01	CESC
TCGA-LP-A4AV-01	CESC
TCGA-VS-A9UR-01	CESC
TCGA-VS-A9V1-01	CESC
TCGA-C5-A7CG-01	CESC
TCGA-UC-A7PI-01	CESC
TCGA-EX-A1H5-01	CESC
TCGA-ZJ-AAXF-01	CESC
TCGA-VS-A9UL-01	CESC
TCGA-EA-A3Y4-01	CESC
TCGA-C5-A7CK-01	CESC
TCGA-VS-A9UJ-01	CESC
TCGA-Q1-A73O-01	CESC
TCGA-VS-A950-01	CESC
TCGA-EA-A439-01	CESC
TCGA-VS-A9UM-01	CESC
TCGA-C5-A1MP-01	CESC
TCGA-VS-A9UI-01	CESC
TCGA-ZJ-AB0H-01	CESC
TCGA-Q1-A73Q-01	CESC
TCGA-C5-A1MH-01	CESC
TCGA-VS-A9V4-01	CESC
TCGA-FU-A40J-01	CESC
TCGA-VS-A9UA-01	CESC
TCGA-LP-A4AW-01	CESC
TCGA-MA-AA43-01	CESC
TCGA-C5-A1BN-01	CESC
TCGA-VS-AA62-01	CESC
TCGA-C5-A1BM-01	CESC
TCGA-C5-A1M6-01	CESC
TCGA-C5-A1BE-01	CESC
TCGA-FU-A23K-01	CESC
TCGA-C5-A1BJ-01	CESC
TCGA-FU-A23L-01	CESC
TCGA-C5-A1M5-01	CESC
TCGA-C5-A1MF-01	CESC
TCGA-C5-A1BF-01	CESC
TCGA-C5-A1BK-01	CESC
TCGA-C5-A1BI-01	CESC
TCGA-C5-A1M9-01	CESC
TCGA-EK-A3GK-01	CESC
TCGA-GH-A9DA-01	CESC
TCGA-VS-A94Y-01	CESC
TCGA-VS-A94Z-01	CESC
TCGA-EA-A4BA-01	CESC
TCGA-ZJ-A8QQ-01	CESC
TCGA-DG-A2KJ-01	CESC
TCGA-VS-A954-01	CESC
TCGA-MA-AA42-01	CESC
TCGA-C5-A8YQ-01	CESC
TCGA-EK-A2R7-01	CESC
TCGA-EK-A3GJ-01	CESC
TCGA-C5-A902-01	CESC
TCGA-MA-AA3W-01	CESC
TCGA-C5-A905-01	CESC
TCGA-EK-A2RN-01	CESC
TCGA-FU-A57G-01	CESC
TCGA-C5-A8YR-01	CESC
TCGA-EK-A2R9-01	CESC
TCGA-FU-A3EO-01	CESC
TCGA-IR-A3LC-01	CESC
TCGA-VS-A8QA-01	CESC
TCGA-C5-A3HD-01	CESC
TCGA-MY-A5BE-01	CESC
TCGA-EA-A50E-01	CESC
TCGA-VS-A8QH-01	CESC
TCGA-ZJ-A8QR-01	CESC
TCGA-C5-A907-01	CESC
TCGA-IR-A3LK-01	CESC
TCGA-C5-A8ZZ-01	CESC
TCGA-VS-A8EK-01	CESC
TCGA-C5-A7UC-01	CESC
TCGA-C5-A8XJ-01	CESC
TCGA-IR-A3LH-01	CESC
TCGA-EK-A3GM-01	CESC
TCGA-VS-A8Q8-01	CESC
TCGA-EK-A2RO-01	CESC
TCGA-MY-A5BD-01	CESC
TCGA-C5-A2LZ-01	CESC
TCGA-C5-A901-01	CESC
TCGA-VS-A953-01	CESC
TCGA-MU-A51Y-01	CESC
TCGA-EK-A2RK-01	CESC
TCGA-UC-A7PD-01	CESC
TCGA-EA-A3HS-01	CESC
TCGA-VS-A8QM-01	CESC
TCGA-EA-A3HU-01	CESC
TCGA-VS-A94X-01	CESC
TCGA-C5-A7CO-01	CESC
TCGA-C5-A3HF-01	CESC
TCGA-IR-A3LL-01	CESC
TCGA-MY-A913-01	CESC
TCGA-VS-A952-01	CESC
TCGA-IR-A3LI-01	CESC
TCGA-VS-A94W-01	CESC
TCGA-MY-A5BF-01	CESC
TCGA-EK-A2RC-01	CESC
TCGA-VS-A8EL-01	CESC
TCGA-EA-A97N-01	CESC
TCGA-EA-A3HQ-01	CESC
TCGA-EK-A2RD-01	CESC
TCGA-C5-A8YT-01	CESC
TCGA-FU-A3HZ-01	CESC
TCGA-VS-A8EJ-01	CESC
TCGA-C5-A3HL-01	CESC
TCGA-UC-A7PF-01	CESC
TCGA-C5-A8XK-01	CESC
TCGA-EX-A8YF-01	CESC
TCGA-HM-A4S6-01	CESC
TCGA-VS-A8Q9-01	CESC
TCGA-MA-AA41-01	CESC
TCGA-EK-A3GN-01	CESC
TCGA-MA-AA3Y-01	CESC
TCGA-MA-AA3Z-01	CESC
TCGA-EK-A2RE-01	CESC
TCGA-C5-A1BQ-01	CESC
TCGA-ZJ-A8QO-01	CESC
TCGA-JW-A852-01	CESC
TCGA-DS-A7WH-01	CESC
TCGA-JW-AAVH-01	CESC
TCGA-EA-A556-01	CESC
TCGA-EA-A44S-01	CESC
TCGA-4J-AA1J-01	CESC
TCGA-IR-A3L7-01	CESC
TCGA-C5-A7X3-01	CESC
TCGA-HG-A2PA-01	CESC
TCGA-C5-A8XH-01	CESC
TCGA-C5-A7XC-01	CESC
TCGA-VS-A8EI-01	CESC
TCGA-VS-A8QC-01	CESC
TCGA-C5-A7UH-01	CESC
TCGA-WL-A834-01	CESC
TCGA-C5-A8XI-01	CESC
TCGA-DS-A7WI-01	CESC
TCGA-VS-A8QF-01	CESC
TCGA-EA-A3HR-01	CESC
TCGA-DG-A2KL-01	CESC
TCGA-EK-A2RL-01	CESC
TCGA-W5-AA36-01	CHOL
TCGA-ZH-A8Y5-01	CHOL
TCGA-W5-AA2Q-01	CHOL
TCGA-3X-AAVA-01	CHOL
TCGA-W5-AA38-01	CHOL
TCGA-ZH-A8Y1-01	CHOL
TCGA-ZH-A8Y2-01	CHOL
TCGA-W5-AA2H-01	CHOL
TCGA-4G-AAZO-01	CHOL
TCGA-W5-AA2I-01	CHOL
TCGA-W5-AA2G-01	CHOL
TCGA-W5-AA31-01	CHOL
TCGA-WD-A7RX-01	CHOL
TCGA-4G-AAZT-01	CHOL
TCGA-W5-AA2O-01	CHOL
TCGA-W5-AA34-01	CHOL
TCGA-ZD-A8I3-01	CHOL
TCGA-3X-AAVC-01	CHOL
TCGA-3X-AAVE-01	CHOL
TCGA-W6-AA0S-01	CHOL
TCGA-3X-AAV9-01	CHOL
TCGA-W5-AA2X-01	CHOL
TCGA-W5-AA2U-01	CHOL
TCGA-ZH-A8Y8-01	CHOL
TCGA-W5-AA30-01	CHOL
TCGA-W5-AA39-01	CHOL
TCGA-ZU-A8S4-01	CHOL
TCGA-W5-AA2T-01	CHOL
TCGA-ZH-A8Y4-01	CHOL
TCGA-W5-AA33-01	CHOL
TCGA-3X-AAVB-01	CHOL
TCGA-ZH-A8Y6-01	CHOL
TCGA-W5-AA2Z-01	CHOL
TCGA-W5-AA2R-01	CHOL
TCGA-W5-AA2W-01	CHOL
TCGA-YR-A95A-01	CHOL
TCGA-G4-6321-01	COAD
TCGA-AZ-6608-01	COAD
TCGA-AA-3713-01	COAD
TCGA-CM-5864-01	COAD
TCGA-CK-5913-01	COAD
TCGA-CM-5863-01	COAD
TCGA-AA-3495-01	COAD
TCGA-QG-A5YW-01	COAD
TCGA-A6-5665-01	COAD
TCGA-CA-5255-01	COAD
TCGA-CM-5349-01	COAD
TCGA-CK-4947-01	COAD
TCGA-G4-6297-01	COAD
TCGA-AZ-6606-01	COAD
TCGA-CM-6675-01	COAD
TCGA-NH-A50U-01	COAD
TCGA-AD-6899-01	COAD
TCGA-AY-A8YK-01	COAD
TCGA-AD-6895-01	COAD
TCGA-F4-6805-01	COAD
TCGA-A6-3809-01	COAD
TCGA-AY-5543-01	COAD
TCGA-D5-6931-01	COAD
TCGA-G4-6627-01	COAD
TCGA-A6-5657-01	COAD
TCGA-CM-6165-01	COAD
TCGA-CM-5861-01	COAD
TCGA-A6-6649-01	COAD
TCGA-CM-5348-01	COAD
TCGA-A6-2671-01	COAD
TCGA-A6-2672-01	COAD
TCGA-AY-A69D-01	COAD
TCGA-A6-5662-01	COAD
TCGA-AA-3509-01	COAD
TCGA-D5-6536-01	COAD
TCGA-D5-6539-01	COAD
TCGA-D5-6929-01	COAD
TCGA-AA-3510-01	COAD
TCGA-CM-6679-01	COAD
TCGA-A6-5666-01	COAD
TCGA-A6-6140-01	COAD
TCGA-CA-5796-01	COAD
TCGA-F4-6463-01	COAD
TCGA-D5-6928-01	COAD
TCGA-A6-6648-01	COAD
TCGA-CA-6719-01	COAD
TCGA-AZ-4323-01	COAD
TCGA-CM-6161-01	COAD
TCGA-F4-6856-01	COAD
TCGA-DM-A1D7-01	COAD
TCGA-CM-4746-01	COAD
TCGA-A6-5661-01	COAD
TCGA-DM-A1D6-01	COAD
TCGA-A6-2685-01	COAD
TCGA-AZ-4315-01	COAD
TCGA-CM-6674-01	COAD
TCGA-CM-4743-01	COAD
TCGA-A6-2677-01	COAD
TCGA-D5-5537-01	COAD
TCGA-CA-6717-01	COAD
TCGA-F4-6569-01	COAD
TCGA-D5-6930-01	COAD
TCGA-F4-6807-01	COAD
TCGA-4T-AA8H-01	COAD
TCGA-CM-6164-01	COAD
TCGA-A6-6782-01	COAD
TCGA-A6-4105-01	COAD
TCGA-D5-5541-01	COAD
TCGA-AA-3506-01	COAD
TCGA-DM-A28E-01	COAD
TCGA-A6-6138-01	COAD
TCGA-AZ-4682-01	COAD
TCGA-D5-6932-01	COAD
TCGA-D5-6538-01	COAD
TCGA-AD-6888-01	COAD
TCGA-CM-6678-01	COAD
TCGA-CM-5344-01	COAD
TCGA-A6-5656-01	COAD
TCGA-F4-6809-01	COAD
TCGA-F4-6806-01	COAD
TCGA-AA-3502-01	COAD
TCGA-NH-A8F8-01	COAD
TCGA-AY-6196-01	COAD
TCGA-CM-5868-01	COAD
TCGA-RU-A8FL-01	COAD
TCGA-CK-4951-01	COAD
TCGA-D5-6922-01	COAD
TCGA-AA-3697-01	COAD
TCGA-A6-6142-01	COAD
TCGA-F4-6704-01	COAD
TCGA-AZ-6599-01	COAD
TCGA-5M-AAT4-01	COAD
TCGA-CK-5914-01	COAD
TCGA-CM-5860-01	COAD
TCGA-AZ-4681-01	COAD
TCGA-AD-6965-01	COAD
TCGA-A6-6780-01	COAD
TCGA-A6-2686-01	COAD
TCGA-CM-4750-01	COAD
TCGA-CM-6677-01	COAD
TCGA-A6-A567-01	COAD
TCGA-D5-5540-01	COAD
TCGA-DM-A1DB-01	COAD
TCGA-QG-A5Z2-01	COAD
TCGA-D5-6898-01	COAD
TCGA-AZ-5407-01	COAD
TCGA-A6-2684-01	COAD
TCGA-CM-6167-01	COAD
TCGA-DM-A28G-01	COAD
TCGA-AA-3488-01	COAD
TCGA-AA-3492-01	COAD
TCGA-G4-6322-01	COAD
TCGA-AD-6889-01	COAD
TCGA-CM-6163-01	COAD
TCGA-G4-6586-01	COAD
TCGA-G4-6323-01	COAD
TCGA-CA-5797-01	COAD
TCGA-CK-4950-01	COAD
TCGA-D5-6529-01	COAD
TCGA-DM-A1D0-01	COAD
TCGA-DM-A282-01	COAD
TCGA-A6-5660-01	COAD
TCGA-G4-6299-01	COAD
TCGA-DM-A1DA-01	COAD
TCGA-D5-6920-01	COAD
TCGA-DM-A1D8-01	COAD
TCGA-DM-A1HA-01	COAD
TCGA-DM-A285-01	COAD
TCGA-G4-6303-01	COAD
TCGA-G4-6294-01	COAD
TCGA-AZ-6601-01	COAD
TCGA-CM-4752-01	COAD
TCGA-AZ-4684-01	COAD
TCGA-D5-6532-01	COAD
TCGA-A6-A565-01	COAD
TCGA-5M-AATA-01	COAD
TCGA-D5-6531-01	COAD
TCGA-5M-AAT5-01	COAD
TCGA-DM-A0XD-01	COAD
TCGA-CK-6751-01	COAD
TCGA-G4-6311-01	COAD
TCGA-A6-6137-01	COAD
TCGA-A6-A566-01	COAD
TCGA-G4-6625-01	COAD
TCGA-DM-A28F-01	COAD
TCGA-A6-6141-01	COAD
TCGA-A6-5659-01	COAD
TCGA-AZ-6603-01	COAD
TCGA-D5-6927-01	COAD
TCGA-AU-6004-01	COAD
TCGA-F4-6854-01	COAD
TCGA-CK-4952-01	COAD
TCGA-A6-5667-01	COAD
TCGA-G4-6315-01	COAD
TCGA-A6-6781-01	COAD
TCGA-D5-6541-01	COAD
TCGA-DM-A1D9-01	COAD
TCGA-A6-2680-01	COAD
TCGA-AD-6901-01	COAD
TCGA-CK-6748-01	COAD
TCGA-AA-3496-01	COAD
TCGA-CM-4751-01	COAD
TCGA-A6-6652-01	COAD
TCGA-AA-3494-01	COAD
TCGA-F4-6459-01	COAD
TCGA-SS-A7HO-01	COAD
TCGA-A6-6650-01	COAD
TCGA-DM-A28A-01	COAD
TCGA-D5-6534-01	COAD
TCGA-AZ-4616-01	COAD
TCGA-D5-6533-01	COAD
TCGA-QG-A5Z1-01	COAD
TCGA-DM-A0XF-01	COAD
TCGA-G4-6295-01	COAD
TCGA-CM-6680-01	COAD
TCGA-CM-6171-01	COAD
TCGA-AA-3660-01	COAD
TCGA-F4-6461-01	COAD
TCGA-CM-4747-01	COAD
TCGA-AM-5820-01	COAD
TCGA-DM-A28H-01	COAD
TCGA-D5-7000-01	COAD
TCGA-G4-6320-01	COAD
TCGA-5M-AAT6-01	COAD
TCGA-AZ-6605-01	COAD
TCGA-G4-6310-01	COAD
TCGA-DM-A28M-01	COAD
TCGA-G4-6317-01	COAD
TCGA-DM-A1D4-01	COAD
TCGA-CM-6170-01	COAD
TCGA-NH-A50T-01	COAD
TCGA-NH-A6GB-01	COAD
TCGA-A6-2681-01	COAD
TCGA-A6-2679-01	COAD
TCGA-D5-6537-01	COAD
TCGA-4N-A93T-01	COAD
TCGA-AA-3663-01	COAD
TCGA-D5-6530-01	COAD
TCGA-NH-A8F7-01	COAD
TCGA-CK-4948-01	COAD
TCGA-3L-AA1B-01	COAD
TCGA-AZ-4615-01	COAD
TCGA-D5-5538-01	COAD
TCGA-G4-6306-01	COAD
TCGA-AD-6964-01	COAD
TCGA-AD-A5EJ-01	COAD
TCGA-A6-6651-01	COAD
TCGA-DM-A1HB-01	COAD
TCGA-D5-6535-01	COAD
TCGA-AY-6197-01	COAD
TCGA-CA-5256-01	COAD
TCGA-T9-A92H-01	COAD
TCGA-AZ-6598-01	COAD
TCGA-DM-A0X9-01	COAD
TCGA-AD-6963-01	COAD
TCGA-G4-6626-01	COAD
TCGA-G4-6628-01	COAD
TCGA-CA-6716-01	COAD
TCGA-A6-6653-01	COAD
TCGA-AA-3489-01	COAD
TCGA-A6-2682-01	COAD
TCGA-G4-6304-01	COAD
TCGA-F4-6855-01	COAD
TCGA-AZ-4308-01	COAD
TCGA-NH-A6GA-01	COAD
TCGA-NH-A50V-01	COAD
TCGA-CK-5912-01	COAD
TCGA-DM-A288-01	COAD
TCGA-AD-6548-01	COAD
TCGA-AD-6890-01	COAD
TCGA-G4-6293-01	COAD
TCGA-CK-5916-01	COAD
TCGA-CK-6747-01	COAD
TCGA-QL-A97D-01	COAD
TCGA-A6-A56B-01	COAD
TCGA-G4-6307-01	COAD
TCGA-AZ-6600-01	COAD
TCGA-CM-4748-01	COAD
TCGA-F4-6808-01	COAD
TCGA-G4-6309-01	COAD
TCGA-AA-3662-01	COAD
TCGA-AY-A71X-01	COAD
TCGA-CM-6169-01	COAD
TCGA-DM-A28K-01	COAD
TCGA-D5-6540-01	COAD
TCGA-CA-5254-01	COAD
TCGA-AY-6386-01	COAD
TCGA-AA-3655-01	COAD
TCGA-D5-6926-01	COAD
TCGA-AD-5900-01	COAD
TCGA-A6-A5ZU-01	COAD
TCGA-DM-A28C-01	COAD
TCGA-G4-6302-01	COAD
TCGA-AZ-5403-01	COAD
TCGA-D5-6923-01	COAD
TCGA-AA-3712-01	COAD
TCGA-AU-3779-01	COAD
TCGA-CM-6172-01	COAD
TCGA-AZ-4614-01	COAD
TCGA-5M-AATE-01	COAD
TCGA-A6-5664-01	COAD
TCGA-CM-4744-01	COAD
TCGA-CM-6166-01	COAD
TCGA-DM-A280-01	COAD
TCGA-A6-4107-01	COAD
TCGA-AZ-6607-01	COAD
TCGA-CM-5862-01	COAD
TCGA-NH-A5IV-01	COAD
TCGA-AA-3511-01	COAD
TCGA-AD-A5EK-01	COAD
TCGA-QG-A5YX-01	COAD
TCGA-CM-6168-01	COAD
TCGA-AM-5821-01	COAD
TCGA-F4-6570-01	COAD
TCGA-D5-6924-01	COAD
TCGA-G4-6588-01	COAD
TCGA-AY-A54L-01	COAD
TCGA-CK-6746-01	COAD
TCGA-A6-3810-01	COAD
TCGA-G4-6298-01	COAD
TCGA-CK-5915-01	COAD
TCGA-CA-6718-01	COAD
TCGA-CM-6162-01	COAD
TCGA-D5-5539-01	COAD
TCGA-QG-A5YV-01	COAD
TCGA-G4-6314-01	COAD
TCGA-AZ-4313-01	COAD
TCGA-CM-6676-01	COAD
TCGA-NH-A6GC-01	COAD
TCGA-A6-6654-01	COAD
TCGA-A6-2675-01	COAD
TCGA-F4-6460-01	COAD
TCGA-CA-6715-01	COAD
TCGA-CM-5341-01	COAD
TCGA-F4-6703-01	COAD
TCGA-WS-AB45-01	COAD
TCGA-2H-A9GK-01	ESCA
TCGA-L5-A8NW-01	ESCA
TCGA-R6-A8W5-01	ESCA
TCGA-L5-A8NH-01	ESCA
TCGA-2H-A9GR-01	ESCA
TCGA-L5-A8NV-01	ESCA
TCGA-XP-A8T8-01	ESCA
TCGA-L5-A88Z-01	ESCA
TCGA-R6-A6XG-01	ESCA
TCGA-L5-A8NN-01	ESCA
TCGA-LN-A9FP-01	ESCA
TCGA-LN-A4MR-01	ESCA
TCGA-L5-A8NS-01	ESCA
TCGA-LN-A4MQ-01	ESCA
TCGA-LN-A4A9-01	ESCA
TCGA-VR-A8EX-01	ESCA
TCGA-JY-A938-01	ESCA
TCGA-JY-A6FA-01	ESCA
TCGA-R6-A8WG-01	ESCA
TCGA-VR-A8EO-01	ESCA
TCGA-VR-A8EU-01	ESCA
TCGA-R6-A6L6-01	ESCA
TCGA-L5-A8NE-01	ESCA
TCGA-LN-A8I1-01	ESCA
TCGA-L5-A893-01	ESCA
TCGA-L5-A8NU-01	ESCA
TCGA-R6-A6XQ-01	ESCA
TCGA-LN-A5U5-01	ESCA
TCGA-Z6-A8JD-01	ESCA
TCGA-L5-A4OT-01	ESCA
TCGA-ZR-A9CJ-01	ESCA
TCGA-Z6-A8JE-01	ESCA
TCGA-JY-A6FH-01	ESCA
TCGA-XP-A8T6-01	ESCA
TCGA-R6-A8W8-01	ESCA
TCGA-JY-A93E-01	ESCA
TCGA-2H-A9GI-01	ESCA
TCGA-VR-A8Q7-01	ESCA
TCGA-R6-A6Y0-01	ESCA
TCGA-VR-A8EZ-01	ESCA
TCGA-2H-A9GL-01	ESCA
TCGA-LN-A8HZ-01	ESCA
TCGA-L5-A891-01	ESCA
TCGA-L5-A8NM-01	ESCA
TCGA-JY-A93D-01	ESCA
TCGA-XP-A8T7-01	ESCA
TCGA-L5-A4OX-01	ESCA
TCGA-R6-A6Y2-01	ESCA
TCGA-2H-A9GF-01	ESCA
TCGA-2H-A9GO-01	ESCA
TCGA-L5-A8NR-01	ESCA
TCGA-L5-A88S-01	ESCA
TCGA-VR-A8EW-01	ESCA
TCGA-VR-A8ER-01	ESCA
TCGA-L5-A4OU-01	ESCA
TCGA-JY-A93C-01	ESCA
TCGA-V5-AASX-01	ESCA
TCGA-IG-A97H-01	ESCA
TCGA-L5-A8NT-01	ESCA
TCGA-R6-A8WC-01	ESCA
TCGA-2H-A9GJ-01	ESCA
TCGA-VR-AA4G-01	ESCA
TCGA-JY-A6FD-01	ESCA
TCGA-2H-A9GN-01	ESCA
TCGA-VR-AA4D-01	ESCA
TCGA-IG-A97I-01	ESCA
TCGA-2H-A9GM-01	ESCA
TCGA-L5-A8NG-01	ESCA
TCGA-IG-A5S3-01	ESCA
TCGA-IC-A6RE-01	ESCA
TCGA-2H-A9GG-01	ESCA
TCGA-LN-A5U6-01	ESCA
TCGA-LN-A9FQ-01	ESCA
TCGA-L5-A8NK-01	ESCA
TCGA-L5-A4OS-01	ESCA
TCGA-RE-A7BO-01	ESCA
TCGA-LN-A9FO-01	ESCA
TCGA-L5-A8NJ-01	ESCA
TCGA-JY-A939-01	ESCA
TCGA-VR-A8EY-01	ESCA
TCGA-Z6-A9VB-01	ESCA
TCGA-V5-AASV-01	ESCA
TCGA-LN-A9FR-01	ESCA
TCGA-JY-A6F8-01	ESCA
TCGA-2H-A9GQ-01	ESCA
TCGA-L5-A8NL-01	ESCA
TCGA-2H-A9GH-01	ESCA
TCGA-L5-A8NF-01	ESCA
TCGA-L5-A8NI-01	ESCA
TCGA-JY-A6FB-01	ESCA
[truncated: 6,152 more rows]
